# Supplementary material for: Formylation of a metathesis-derivedansa[4]-ferrocene: a simple route to anticancer organometallics
Source: Royal Society of Chemistry journal article supplement (doi:10.1039/d0dt01975e), 2020-01-01
Supplement: d0dt01975e1.pdf [file d0dt01975e1.pdf]

**Formylation of a metathesis-derived *ansa*[4]-ferrocene: a simple route to anticancer organometallics**

Maria Mazur, Michał Mrozowicz, Włodzimierz Buchowicz,\* Mariola Koszytkowska-Stawińska,  
Radosław Kamiński, Zbigniew Ochal, Patrycja Wińska, Maria Bretner

**SUPPORTING INFORMATION**

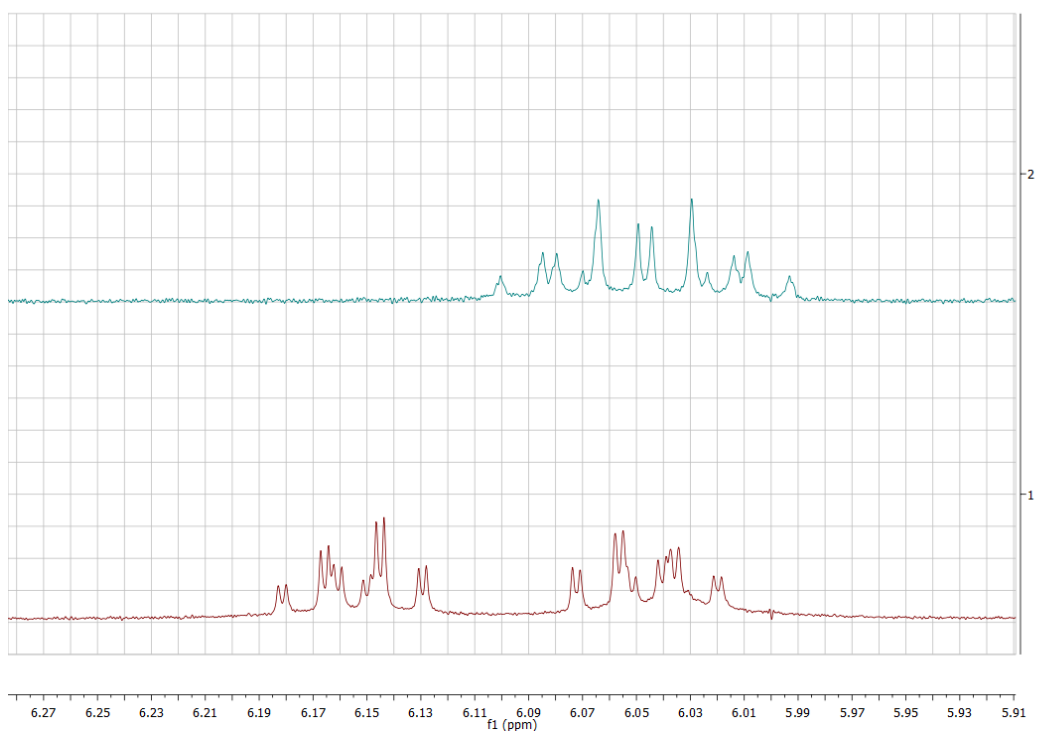

**Figure S1.** The olefinic range of the <sup>1</sup>H NMR spectra of aldehydes (±)-**3** (top) and (±)-**4** (bottom).

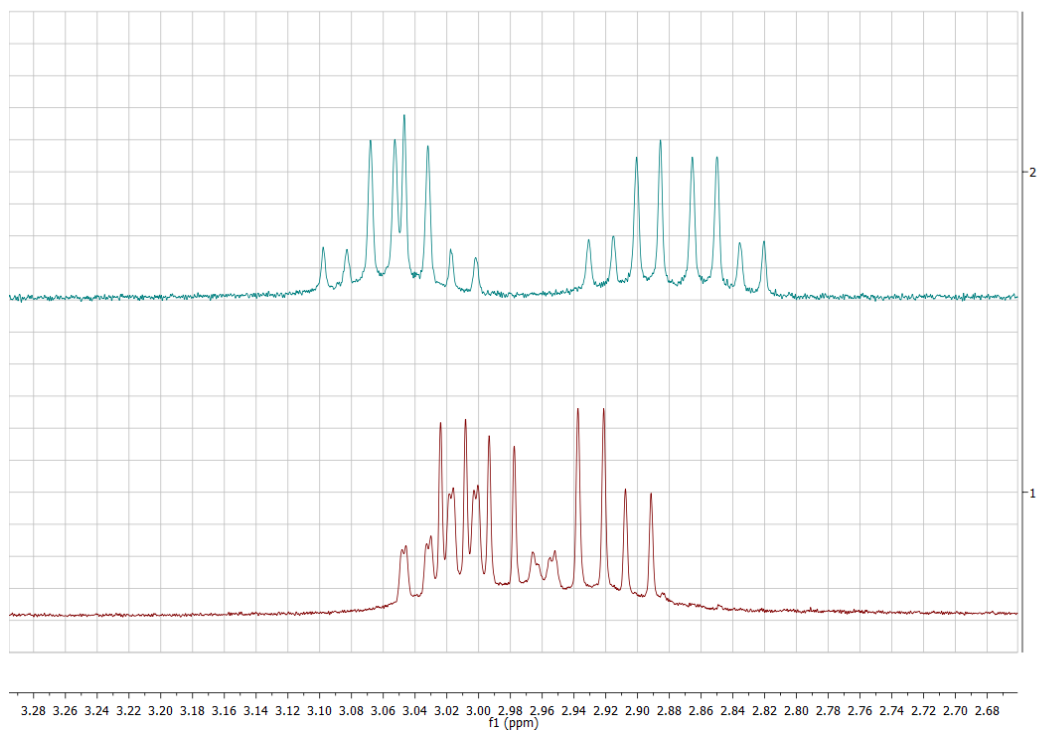

**Figure S2.** The allylic range of the <sup>1</sup>H NMR spectra of aldehydes (±)-**3** (top) and (±)-**4** (bottom).

## ==== Shimadzu LCsolution Analysis Report ====

C:\LabSolutions\Data\Project1\dr Ochal\Włodek\Buchowicz MMrcho3b.lcd

Acquired by : Admin  
 Sample Name : Włodek B MMr-cho-3b  
 Sample ID :  
 (!)Tray# :  
 Injection Volume : 20 uL  
 Data File Name : Buchowicz MMrcho3b.lcd  
 Method File Name : Hex\_iPrOH\_95\_5 Flow\_0\_8.lcm  
 Batch File Name :  
 Report File Name : Raport podstawowy.lcr  
 Data Acquired : 2017-01-27 11:59:52  
 Data Processed : 2017-01-27 12:53:53  
 Komentarz : hexane:i-PrOH (95:5; flow=0,8mL/min; 254 nm

### <Chromatogram>

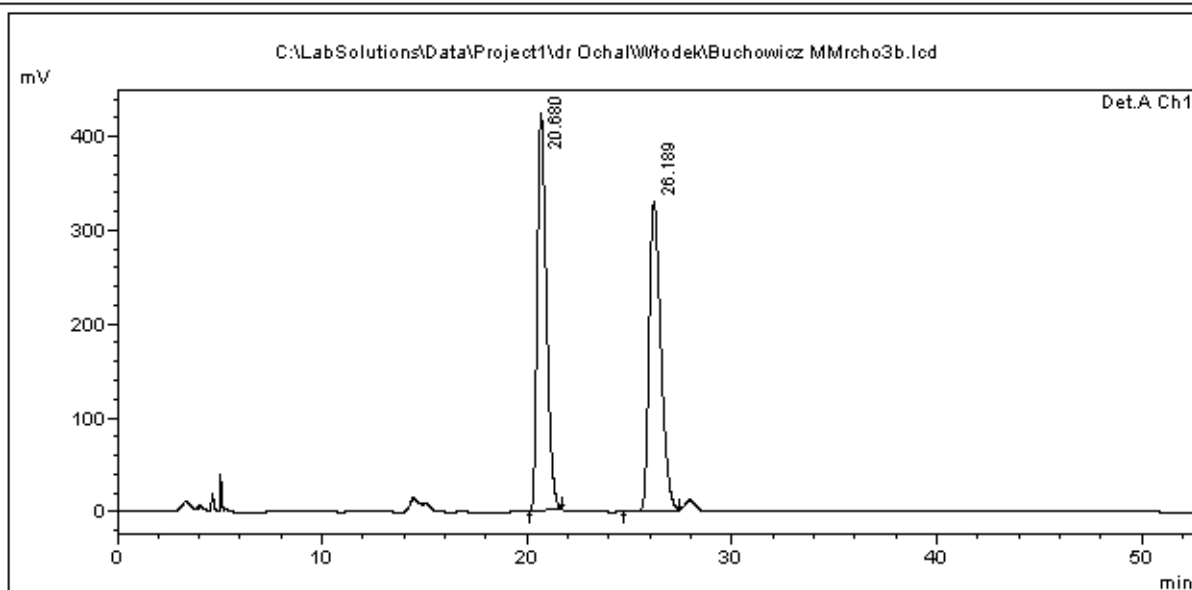

Peak Table

Detector A Ch1 254nm

| Peak# | Ret. Time | Area     | Height | Area %  | Height % |
|-------|-----------|----------|--------|---------|----------|
| 1     | 20.680    | 13142569 | 423684 | 49.911  | 56.267   |
| 2     | 26.189    | 13189552 | 329306 | 50.089  | 43.733   |
| Total |           | 26332121 | 752990 | 100.000 | 100.000  |

**Figure S3.** The chiral HPLC trace of compound ( $\pm$ )-**3**. Conditions: Chiralcel OD-H chiral column (4.6 mm  $\times$  250 mm, from Daicel Chemical Ind., Ltd.), equipped with a precolumn (4 mm  $\times$  10 mm, 5  $\mu$ m) [n-hexane/2-PrOH (95:5, v/v); f = 0.8 mL/min;  $\lambda$  = 254 nm, 30°C].

## ==== Shimadzu LcSolution Analysis Report ====

C:\LabSolutions\Data\Project1\dr OchałWłoddek\Buchowicz (-)- 4 27.02.2020.IADH.lcd  
 Acquired by : Admin  
 Sample Name : ((-)-4 ADH  
 Sample ID :  
 (=)Tray# :  
 Injection Volume : 10 uL  
 Data File Name : Buchowicz (-)- 4 27.02.2020.IADH.lcd  
 Method File Name : Hex\_iPrOH\_95\_5 Flow\_0\_8.lcm  
 Batch File Name :  
 Report File Name : Raport podstawowy.lcr  
 Data Acquired : 2020-02-27 17:53:20  
 Data Processed : 2020-02-27 18:28:06  
 Komentarz : Heksan/EtOH (98:2v/v); flow = 0.4mL/min; 254 nm 30 C ADH

### < Chromatogram >

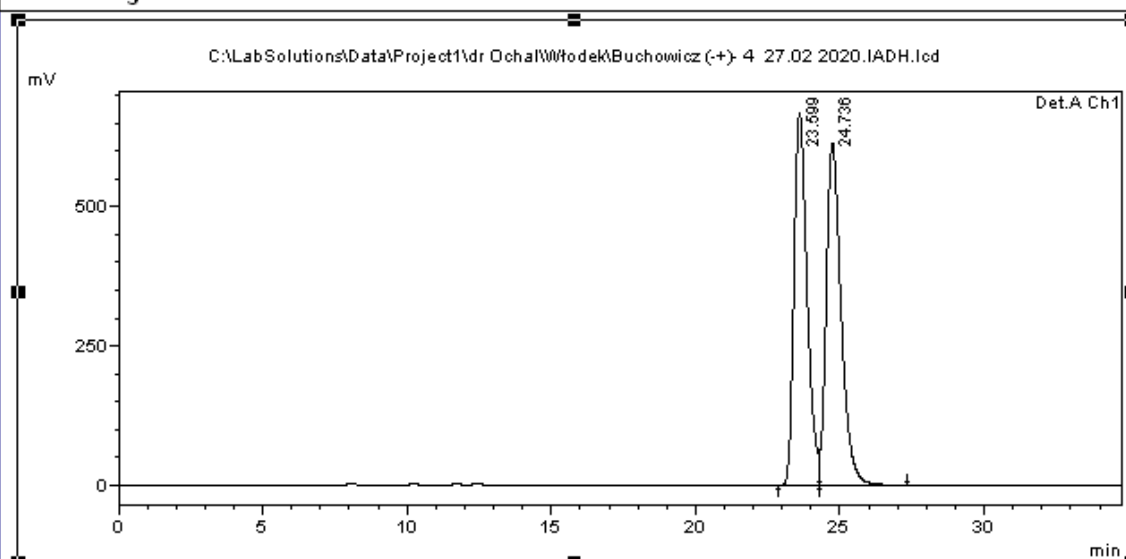

PeakTable

Detector A Ch1 254nm

| Peak# | Ret. Time | Area     | Height  | Area %  | Height % |
|-------|-----------|----------|---------|---------|----------|
| 1     | 23.599    | 20989360 | 668347  | 48.824  | 52.080   |
| 2     | 24.736    | 22000613 | 614957  | 51.176  | 47.920   |
| Total |           | 42989973 | 1283304 | 100.000 | 100.000  |

**Figure S4.** The chiral HPLC trace of compound ( $\pm$ )-4. Conditions: Chiralcel AD-H chiral column (4.6 mm  $\times$  250 mm, from Daicel Chemical Ind., Ltd.), equipped with a precolumn (4 mm  $\times$  10 mm, 5  $\mu$ m) [n-hexane/EtOH (98:2, v/v); f = 0.4 mL/min;  $\lambda$  = 254 nm, 30°C].

### Resolution of (±)-**3** into enantiomers

Under an inert atmosphere, a catalytic amount of *p*-toluenesulfonic acid monohydrate (4.0 mg, 0.021 mmol) was added to a solution of (±)-**3** (55.0 mg, 0.24 mmol) in trimethyl orthoformate (3.50 mL). The resulting solution was stirred overnight at 80-90 °C. Then anhydrous potassium carbonate was added with stirring while the solution was cooled to room temperature. Diethyl ether (10 mL) was added and the mixture was filtered through Celite and concentrated *in vacuo*. The crude dimethylacetal (±)-**5** was used directly in the next step without further purification.

In an another Schlenk flask, molecular sieves 4 Å were added to an emulsion of (S)-(-)-1,2,4-butanetriol (0.10 mL, 0.119 g, 1.12 mmol) in chloroform (2.0 mL), then *p*-toluenesulfonic acid monohydrate (4.0 mg, 0.021 mmol) was added. The crude dimethylacetal (±)-**5** was dissolved in chloroform (1.0 mL) and added to the flask. The resulting mixture was stirred for 2 h at 60 °C. Anhydrous potassium carbonate was added followed by diethyl ether (10 mL). The mixture was filtered and concentrated *in vacuo* to yield brown oil, which was purified by column chromatography on SiO<sub>2</sub> (hexane:ethyl acetate 2.5:1). A yellow band was collected that afforded after the solvents' removal acetals **6** (45.0 mg, 0.12 mmol, 50% yield, 1:1 mixture of diastereoisomers) as a yellow solid. <sup>1</sup>H NMR (500 MHz, CDCl<sub>3</sub>): δ 6.01 (m, 2H, CH=), 5.332 (1H, O-CH-O), 5.326 (1H, O-CH-O), 4.28 (m, 1H, C<sub>5</sub>H<sub>3</sub>), 4.17 (m, 2H, C<sub>5</sub>H<sub>4</sub>) 4.14 (m, 1H, C<sub>5</sub>H<sub>3</sub>), 4.10 (m, 1H, C<sub>5</sub>H<sub>3</sub>), 4.03 (m, 2H, C<sub>5</sub>H<sub>4</sub>), 3.87 (m, CH-O), 3.64 (m, 2H CH<sub>2</sub>-OH), 2.93 (m, 2H, CH<sub>2</sub>CH=), 2.36 (m, 1H, CH<sub>2</sub>CH=), 2.00 (m, 1H, CH<sub>2</sub>CH=), 1.83 (m, 1H, CH<sub>2</sub>), 1.39 (m, 1H, CH<sub>2</sub>) ppm. MS (EI, 70 eV) *m/z* (rel int, %) (<sup>56</sup>Fe): 354 (M<sup>+</sup>, 100), 282 (14), 266 (32), 238 (32), 121 (14). HRMS (EI): *m/z* Found for 354.0920 (Calc for C<sub>19</sub>H<sub>22</sub><sup>56</sup>FeO<sub>3</sub> 354.0918). Anal. Found: C, 65.68; H, 6.68. Calc. for C<sub>19</sub>H<sub>22</sub>FeO<sub>3</sub>×0.2C<sub>6</sub>H<sub>14</sub>: C, 65.35; H, 6.68%.

Acetal **6** (1:1 mixture of diastereoisomers) was dissolved in hexanes and placed in a fridge at +4 °C for 1 day. Yellow crystals were formed that were collected, dried under vacuum and analyzed by

<sup>1</sup>H NMR. The ratio of the two diastereoisomers was established by integration of the diagnostic O-CH-O signals at  $\delta$  5.332 and 5.326 ppm. The isolated crystals were re-dissolved in hexanes. After two crystallizations ratio of two diastereoisomers was 1:3 but the repetition of this operation did not significantly increase this ratio. Maximum enantiomeric excess obtained by this method (after hydrolysis) was 55% (Figure S5).

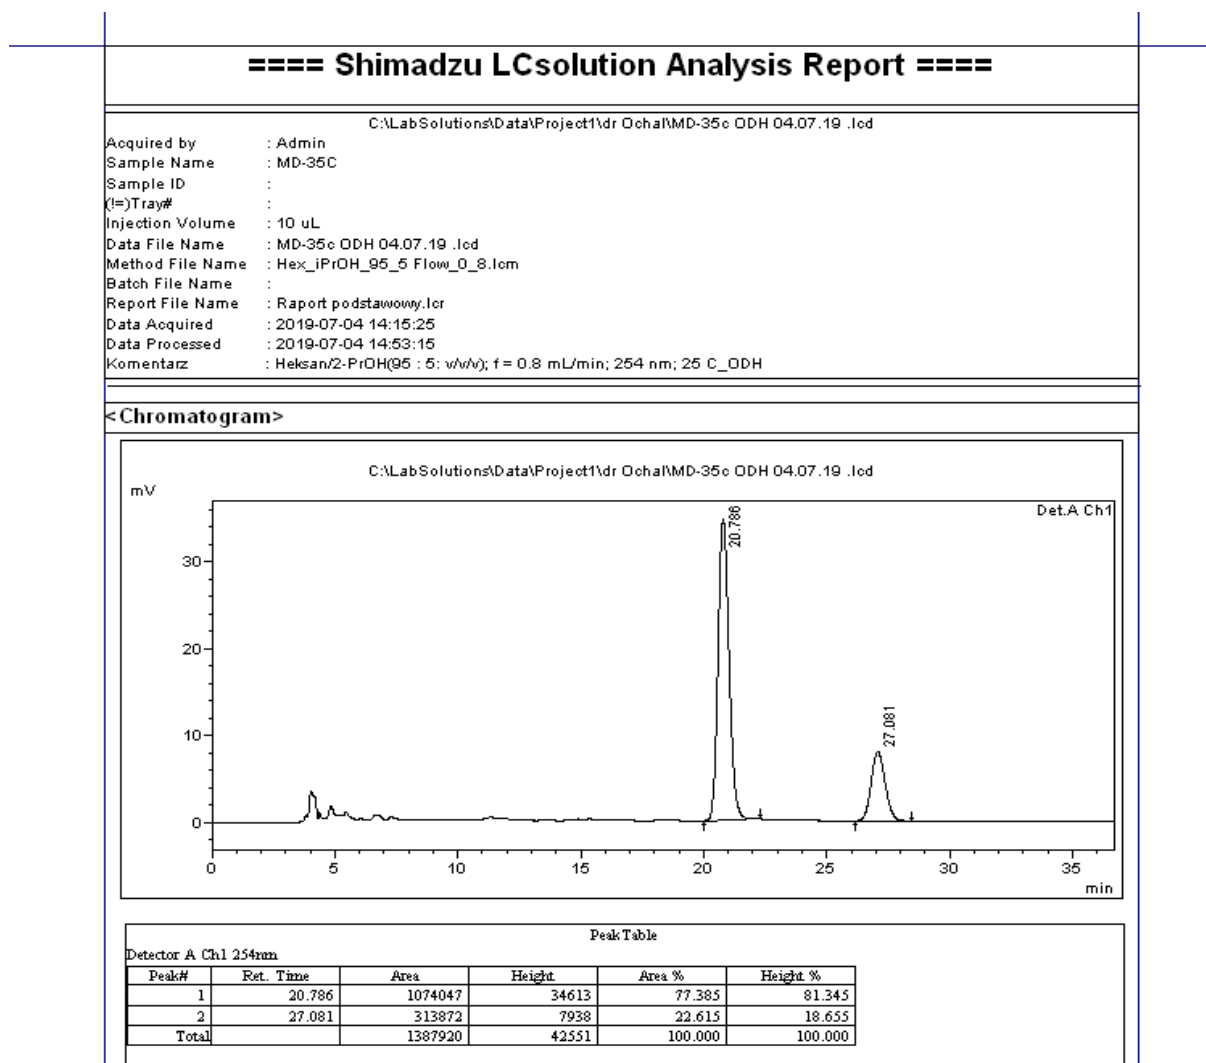

**Figure S5.** The chiral HPLC trace of enantiomerically enriched compound (-)-**3** (55% ee).

Another sample of acetal **6** (1:1 mixture of diastereoisomers) was crystallized from hexanes/2-propanol mixture (10:1, +4 °C, 3 days) giving the second diastereoisomer of **6** with 80% excess

(determined by  $^1\text{H}$  NMR). This sample of **6** (20 mg, 0.05 mmol) was hydrolyzed by heating with *p*-toluenesulfonic acid for 1h in dichloromethane to yield (+)-**3** (8.0 mg, 0.03 mmol, 60%):  $[\alpha]_{\text{D}}^{20} = 167.5$  ( $c = 0.08$  in  $\text{CHCl}_3$ ), 76% ee (Figure S6). The configuration of the major enantiomer in the enriched batch was determined via crystallization (from hexanes at +4 °C) and crystals structure determination. All randomly chosen crystals displayed the (*S<sub>p</sub>*) configuration (note that the space group is chiral).

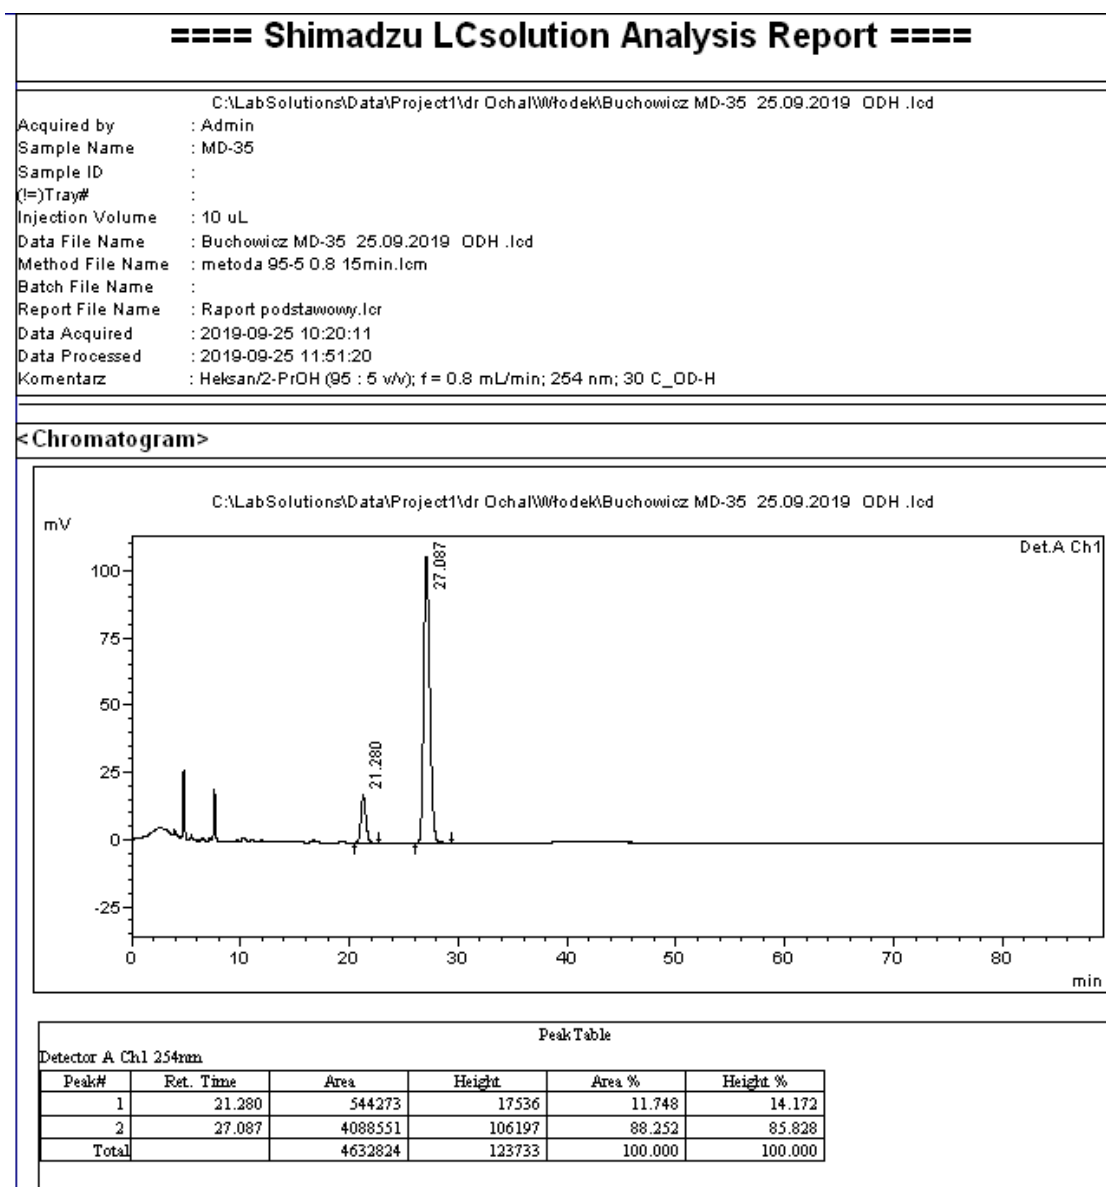

**Figure S6.** The chiral HPLC trace of enantiomerically enriched compound (+)-**3** (76% ee).

**Table S1.** Selected X-ray data collection, processing and refinement parameters for all presented crystal structures.

| <i>Structure</i>                                         | <b>(<i>R<sub>p</sub></i>)-3</b>     | <b>(<i>R<sub>p</sub></i>)-4</b>     |
|----------------------------------------------------------|-------------------------------------|-------------------------------------|
| Moiety formula                                           | C <sub>15</sub> H <sub>14</sub> FeO | C <sub>15</sub> H <sub>14</sub> FeO |
| Moiety formula mass, $M_r$ / a.u.                        | 266.1                               | 266.1                               |
| Crystal system                                           | orthorhombic                        | orthorhombic                        |
| Space group                                              | $P2_12_12_1$                        | $P2_12_12_1$                        |
| $a$ / Å                                                  | 7.4133(5)                           | 7.6075(4)                           |
| $b$ / Å                                                  | 10.1403(8)                          | 11.1031(7)                          |
| $c$ / Å                                                  | 15.2345(8)                          | 13.2087(6)                          |
| $\alpha$ / °                                             | 90                                  | 90                                  |
| $\beta$ / °                                              | 90                                  | 90                                  |
| $\gamma$ / °                                             | 90                                  | 90                                  |
| $V$ / Å <sup>3</sup>                                     | 1145.22(13)                         | 1115.70(10)                         |
| $Z$                                                      | 4                                   | 4                                   |
| $T$ / K                                                  | 100                                 | 100                                 |
| $F_{000}$                                                | 552                                 | 552                                 |
| $d_{\text{calc}}$ / g·cm <sup>-3</sup>                   | 1.544                               | 1.584                               |
| $\theta$ range                                           | 5.24° – 75.94°                      | 5.20° – 76.48°                      |
| Absorption coefficient, $\mu$ / mm <sup>-1</sup>         | 10.360                              | 10.621                              |
| Crystal color & shape                                    | orange, cut crystal                 | orange, cut crystal                 |
| Crystal size / mm <sup>3</sup>                           | 0.03×0.15×0.16                      | 0.10×0.12×0.17                      |
| No. of reflections collected / unique                    | 3160 / 1251                         | 9171 / 2287                         |
| $R_{\text{int}}$                                         | 8.71%                               | 7.04%                               |
| No. of reflections with $I > 3\sigma(I)$                 | 992                                 | 1988                                |
| No. of parameters<br>/ restraints / constraints          | 142 / 0 / 68                        | 154 / 0 / 56                        |
| Flack parameter                                          | 0.13(2)                             | 0.039(7)                            |
| $R[F]$ ( $I > 3\sigma(I)$ )                              | 5.70%                               | 4.33%                               |
| $R[F]$ (all data)                                        | 7.08%                               | 4.72%                               |
| $\rho_{\text{res}}^{\text{min/max}}$ / e·Å <sup>-3</sup> | -0.38 / +0.75                       | -0.40 / +1.01                       |
| CCDC code                                                | 1935549                             | 1935550                             |



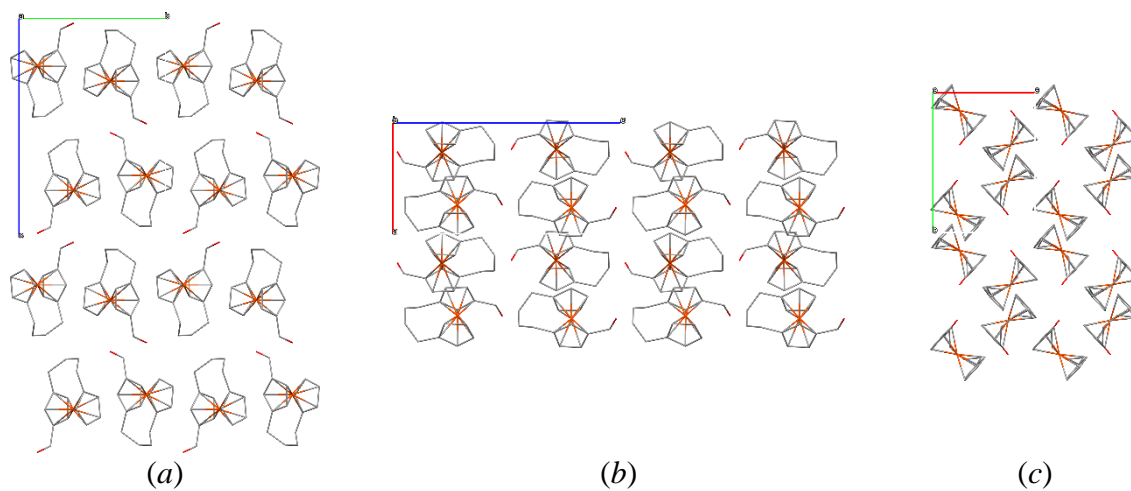

**Figure S7.** Packing of molecules of compound **3**; views along *X* (a), *Y* (b) and *Z* (c) axes.

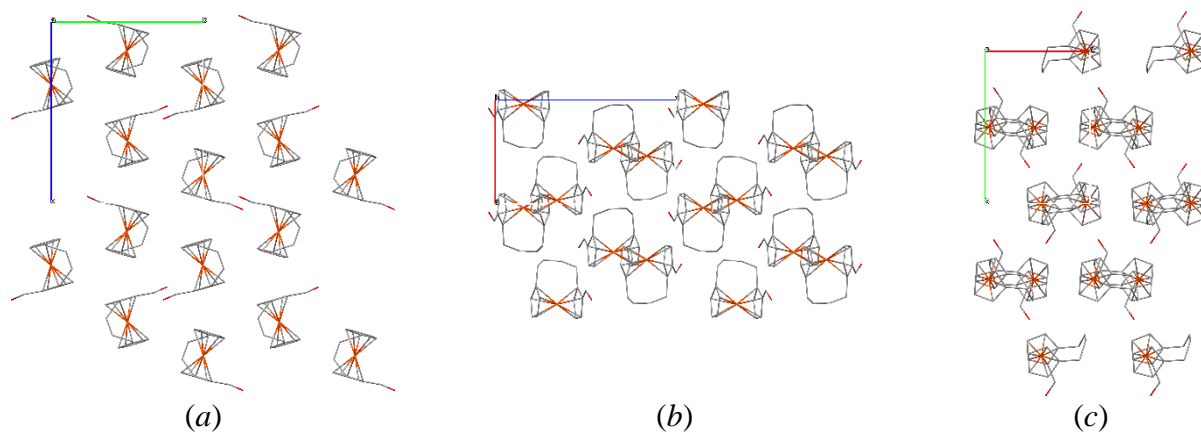

**Figure S8.** Packing of molecules of compound **4**; views along *X* (a), *Y* (b) and *Z* (c) axes.

## Biological evaluation

### MTT-based assay

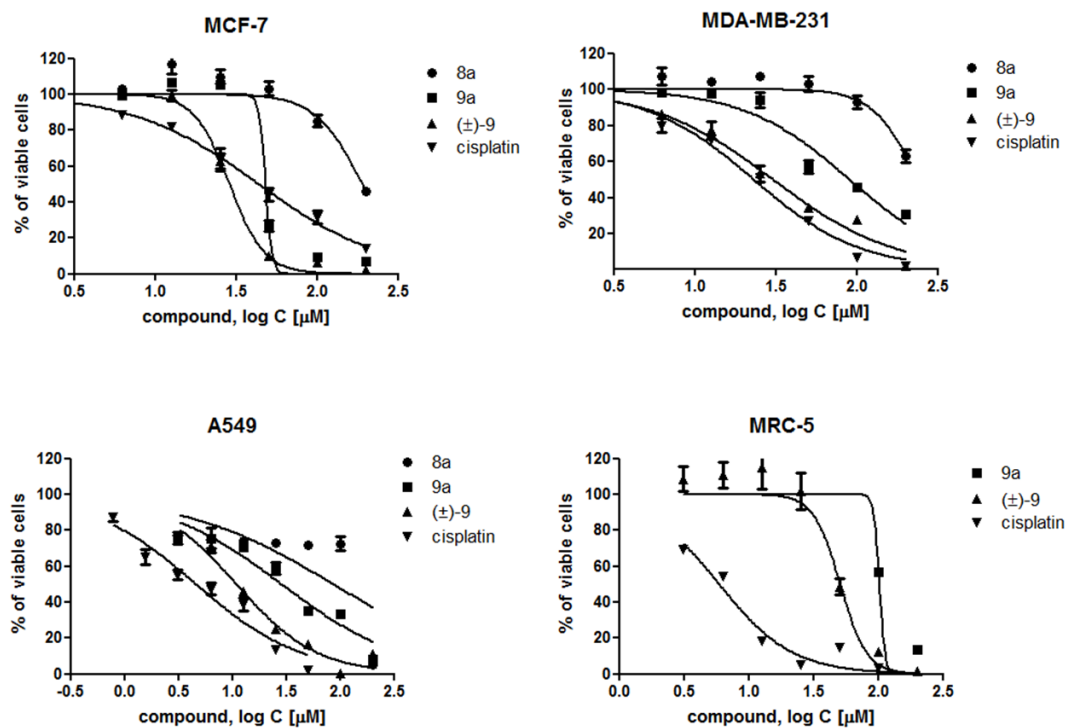

**Figure S9.** Plots generated by GraphPad Prism after fitting the MTT data obtained for MCF-7, MDA-MB-231, A549 and MRC-5 to sigmoidal dose response equation  $Y = 100/(1+10^{((\text{LogEC}_{50}-X)*\text{HillSlope}))})$ ; the concentration (EC<sub>50</sub>) that causes a response half way between the maximal (Top) response and the maximally inhibited (Bottom) response was calculated.

## Senescence studies

Detection of pH-dependent  $\beta$ -galactosidase activity was used as a senescence marker in MCF-7 cell line. Etoposide, a well-known senescence inducing agent was used as a positive control.

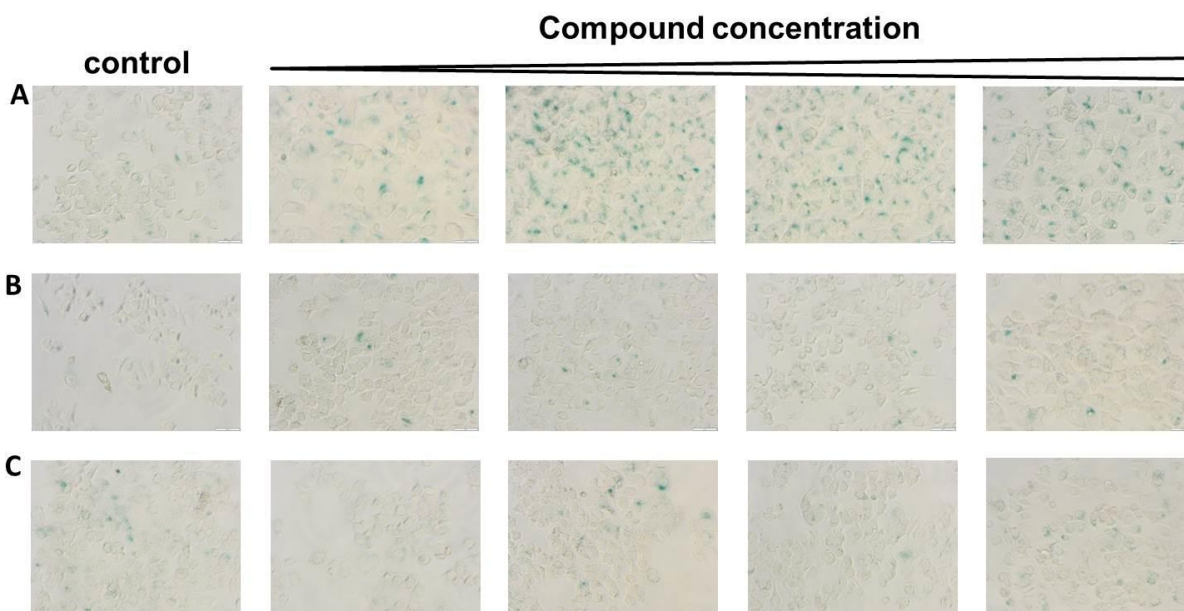

**Figure S10.** The  $\beta$ -galactosidase activity in MCF-7 cells after treatment (48 h) by etoposide (A) and compounds ( $\pm$ )-**9** (B) and **9a** (C).
